# Supplementary material for: Epigallocatechin-3-gallate promotes healthy lifespan through mitohormesis during early-to-mid adulthood in Caenorhabditis elegans
Source: PubMed Central journal article supplement — Redox Biol. 2017 Sep 29;14:305–15. doi: 10.1016/j.redox.2017.09.019 (PMC5635249; doi:10.1016/j.redox.2017.09.019), 2017-09-29
Supplement: mmc1.pdf [file mmc1.pdf]

# 1 Supplementary information

## 2 Supplemental Figures

### 3 Figure S1

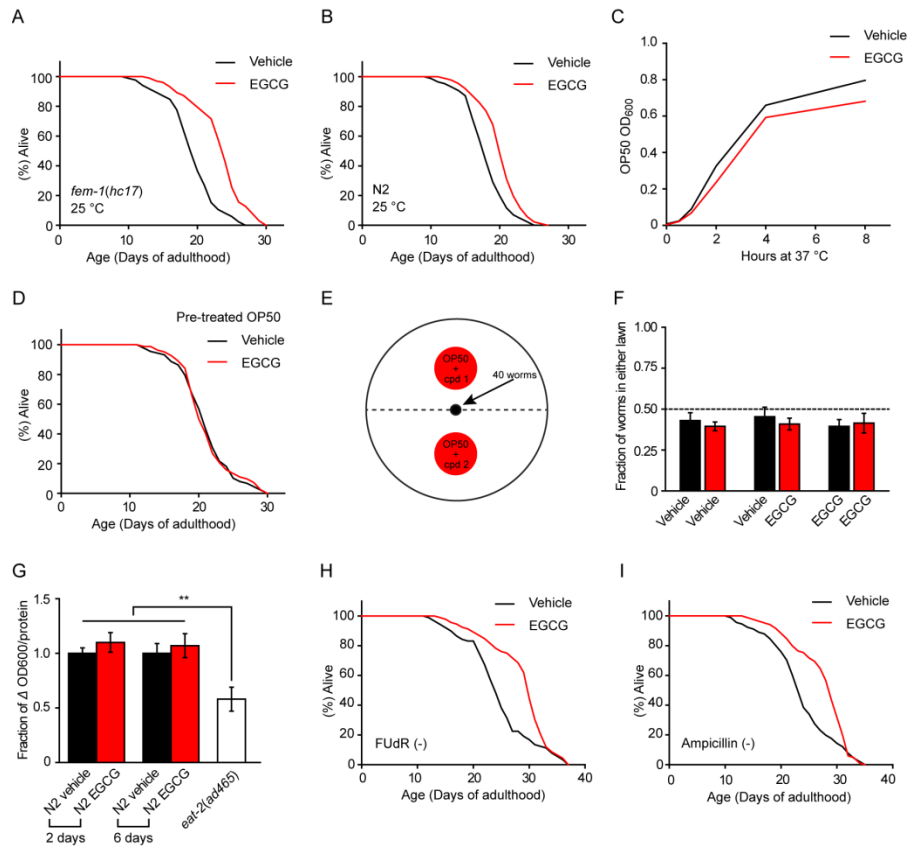

4  
5

6 Figure S2

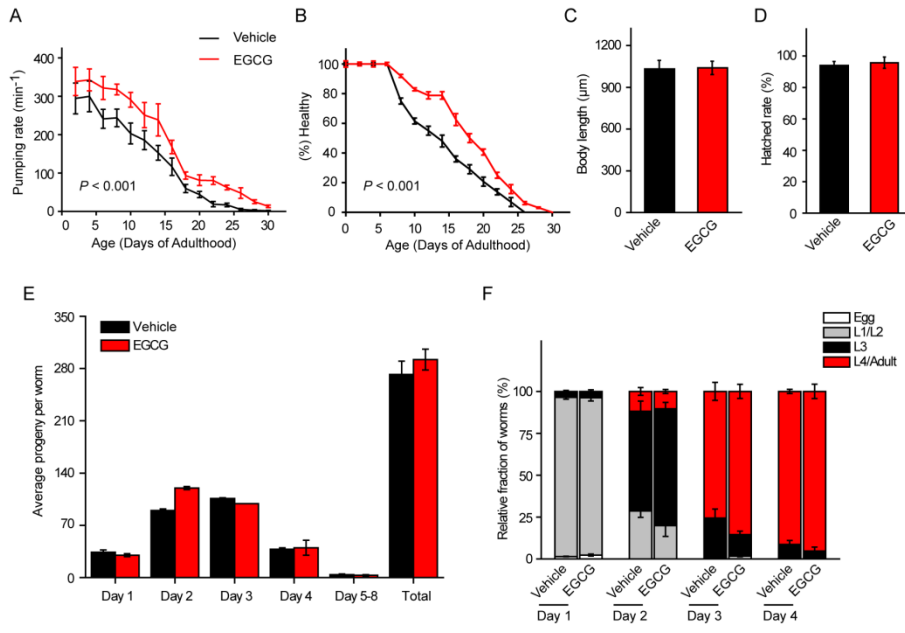

7

8

# 9 Figure S3

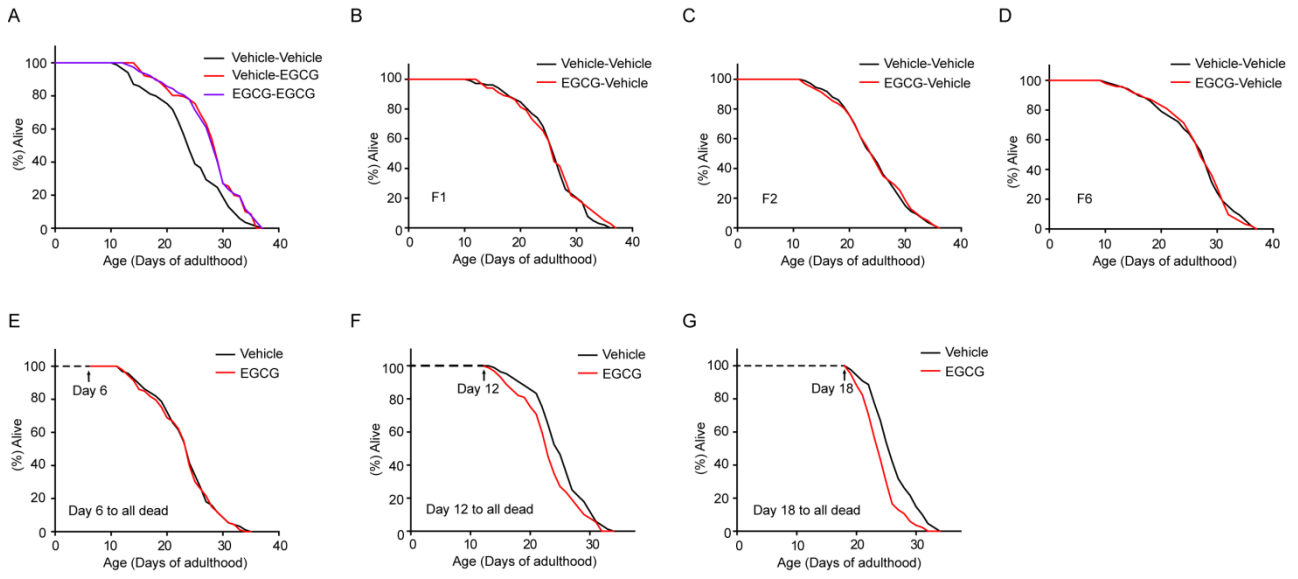

10  
11

12 Figure S4

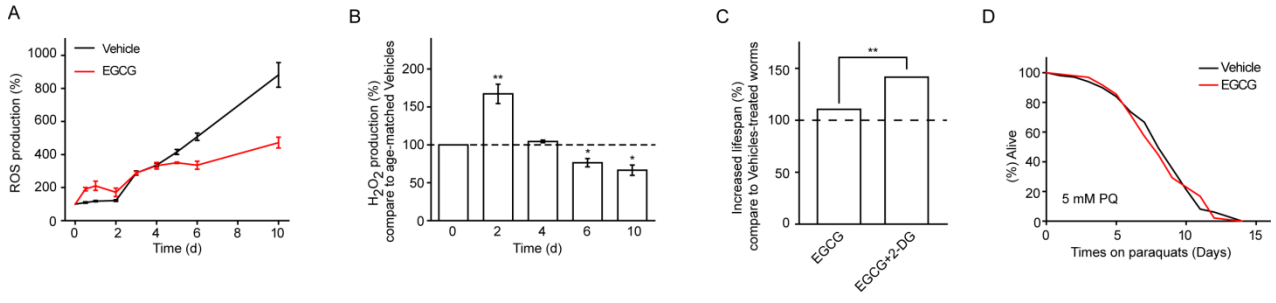

13  
14

15 Figure S5

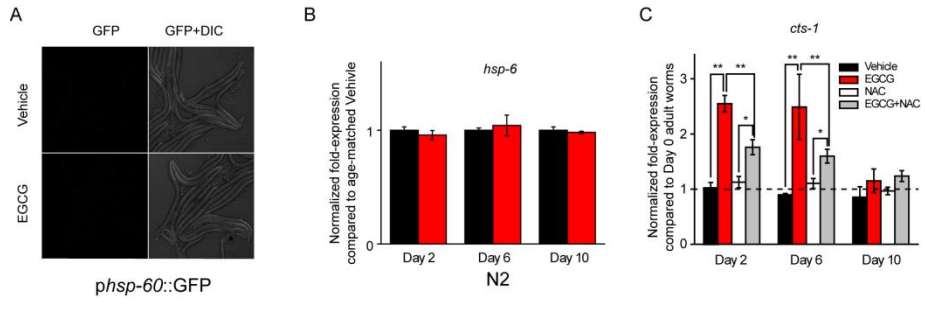

16  
17

18 Figure S6

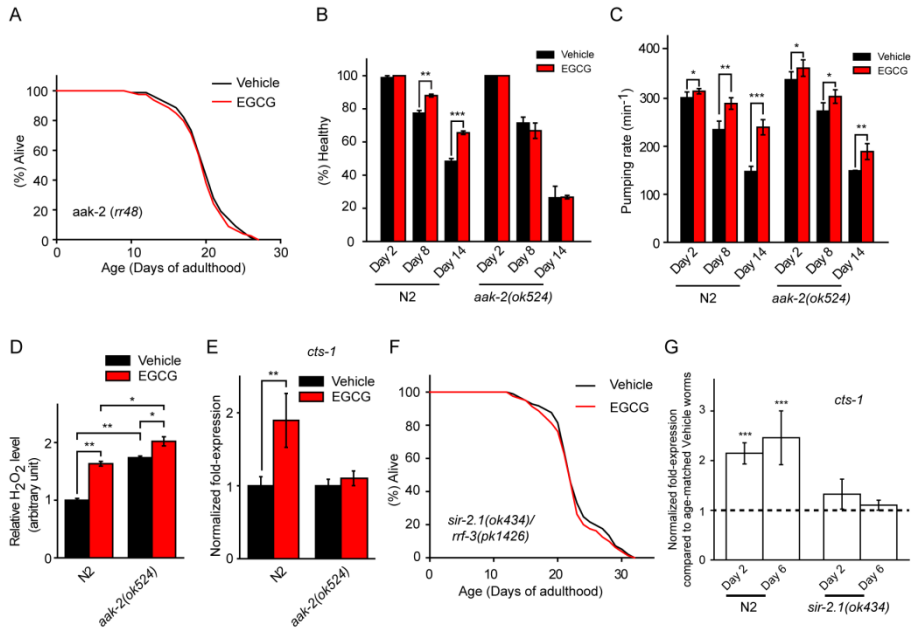

19

20

21 Figure S7

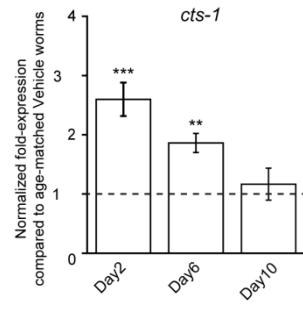

22  
23

## 24 Supplemental Figure Legends

25 Figure S1 Supplementation with EGCG extends lifespan directly. (A-B) EGCG extended  
26 lifespan of *fem-1(hc17)* (A) and N2 (B) worms at 25 °C. (C) Addition of EGCG slightly slowed  
27 the growth of bacterial strains OP50. (D) EGCG-pretreatment of OP50 did not affect lifespan.  
28 (E-F) EGCG was not repulsive for the worms. Schematic representation of food preference  
29 assay (E); worms did not have any preference between EGCG and vehicle as measured during  
30 the bacterial avoidance assay (F). (G) Food uptake after treatment with EGCG (for 2 or 6 days)  
31 in N2 worms and in untreated *eat-2(ad465)* mutants (Day 0 adults). (H-I), FUdR and ampicillin  
32 did not affect the life extension induced by EGCG.

33 Bar graphs are expressed as mean  $\pm$  SEM, \*  $P < 0.05$ ; \*\*  $P < 0.01$ ; \*\*\*  $P < 0.001$ .

34

35 Figure S2 EGCG improves fitness without side effects in *C.elegans*. (A) Pharyngeal pumping  
36 rate on EGCG was significantly altered. (B) Healthspan comparison on EGCG and vehicle plate  
37 as assessed 30 days. (C-F) EGCG had no significant impact on body length (C), hatched rate  
38 (D), brood size (E) and development (F).

39

40 Figure S3 EGCG extends *C.elegans* lifespan independent on the larval stage and progressively  
41 left shift elicited this kind of shift at late-onset administration. (A) EGCG treatment (200  $\mu$ M)  
42 beginning at the egg stage and that beginning in adulthood produced identical lifespan increase.  
43 (B-D) Treatment with EGCG (200  $\mu$ M) during the egg and larval stages had no effect on adult  
44 lifespan of F1 (B), F2 (C) or F6 (D). (E-G) Lifespan of wild-type N2 nematodes exposed to 400  
45  $\mu$ M EGCG at Day 6 (E), 12 (F) and 18 (G) adult stages.



46

47 Figure S4 EGCG induces a transient ROS at early adulthood. (A) EGCG-treated worms  
48 exhibited lower ROS level later in life. (B) EGCG-induced H<sub>2</sub>O<sub>2</sub> production increased after 2  
49 days treated worms and decreases after 6 days treated worms. (C) Treatment with 2-DG  
50 increases the lifespan of EGCG-treated worms. (D) EGCG did not increase oxidative stress  
51 resistance induced by 5 mM PQ after 2 days EGCG treatment.

52 Bar graphs are expressed as mean  $\pm$  SEM, \*  $P < 0.05$ ; \*\*  $P < 0.01$ ; \*\*\*  $P < 0.001$ .

53

54 Figure S5 EGCG induces mitochondrial biogenesis at early stages. (A) EGCG did not induce  
55 the mitochondrial unfolded protein response (UPR<sup>mt</sup>) (*hsp-60* reporter) at Day 2 worms. (B)  
56 EGCG did not affect *hsp-6* mRNA levels at Day 2, 6 and/or 10 in the wild type worms. (C)  
57 EGCG increased *cts-1*, a mitochondrial biogenesis marker, expression and partially affected by  
58 NAC.

59 Bar graphs are expressed as mean  $\pm$  SEM, \*  $P < 0.05$ ; \*\*  $P < 0.01$ ; \*\*\*  $P < 0.001$ .

60

61 Figure S6 AAK-2/AMPK is necessary for EGCG's beneficial effects on lifespan and  
62 age-dependent decline. (A) EGCG did not extend lifespan in the *aak-2(rr48)* mutants. (B)  
63 EGCG delayed the age-dependent decline in healthspan comparison, as evidenced by the  
64 locomotor activity in an *aak-2*-dependent manner. (C) EGCG altered pharyngeal pumping rate  
65 in wild type and *aak-2(ok524)* worms. (D) Total hydrogen peroxide level in wild type worms and  
66 *aak-2(ok524)* mutants upon EGCG treatment were measured with an Amplex Red assay. (E)  
67 EGCG up-regulated *cts-1* expression depended on AAK-2. (F) EGCG did not extend lifespan in

68 the *sir-2.1(ok434)*, *rrf-3(pk1426)* mutants. (G) EGCG up-regulated *cts-1* expression dependent  
69 on SIR-2.1.

70

71 Figure S7 EGCG up-regulated *cts-1* mRNA level declined with age.

72 Bar graphs are expressed as mean  $\pm$  SEM, \*  $P < 0.05$ ; \*\*  $P < 0.01$ ; \*\*\*  $P < 0.001$ .

73 **Table S1 List of primers used for the quantitative real-time reverse**  
 74 **transcription-polymerase chain reaction**

| Gene name     | Primer sequence                                                        |
|---------------|------------------------------------------------------------------------|
| <i>sod-1</i>  | Forward: CCGACACGCTCGTCACGCTT<br>Reverse: ACTGGGGAGCAGCGAGAGCA         |
| <i>sod-2</i>  | Forward: CCGACACGCTCGTCACGCTT<br>Reverse: TCCTTTGGAGACCGCCTCGTGA       |
| <i>sod-3</i>  | Forward: CTAAGGATGGTGAACCTTCA<br>Reverse: CGCGCTTAATAGTGTCCATCAG       |
| <i>sod-4</i>  | Forward: ATGTGGA ACTATCGGAATTGTG<br>Reverse: GGTTGAGATTGTGTA ACTGGA    |
| <i>sod-5</i>  | Forward: ATGGAGACTCAACCGATGG<br>Reverse: GACCACGGAATCTCTTCT            |
| <i>ctl-1</i>  | Forward: CCAATGCTCATGCAAGATGT<br>Reverse: TTGCGTCACGAATGAAGAAG         |
| <i>cl-2</i>   | Forward: ACGTCCTTGGAGCATCTTGT<br>Reverse: GCAAGATGGTGCTGAACAGA         |
| <i>ctl-3</i>  | Forward: CTTCCCCACATGGTCAATCT<br>Reverse: TGTCCTGCATTAGCATTGGA         |
| <i>prdx-2</i> | Forward: TTGTGCTCGCCGCTTCCACC<br>Reverse: GGGTCGATGATGAAGAGTCCACGG     |
| <i>prdx-3</i> | Forward: GTTCCGTTCTCTTGGAGCTG<br>Reverse: CTTGTTGAAATCAGCGAGCA         |
| <i>prdx-6</i> | Forward: GGAGAACAATGGCTGATGC<br>Reverse: ATCTGAACATGGCGTTTGC           |
| <i>trx-1</i>  | Forward: CGTCAACATCCGGAGAAGAT<br>Reverse: AATTGCGTCTCCATTTTGG          |
| <i>trx-2</i>  | Forward: CCATCTCCGTCAAACCAACT<br>Reverse: TGGCGAGAAGA AACTTCT          |
| <i>trx-3</i>  | Forward: GCAGGAGAGCACTTGAAAGG<br>Reverse: TCCA ACTGGAATCGCATGTA        |
| <i>daf-16</i> | Forward: TTTCCGTCCCCGAACTCAA<br>Reverse: ATTCGCCA ACCCATGATGG          |
| <i>hsp-6</i>  | Forward: AACCACCGTCAACAACGCCG<br>Reverse: AGCGATGATCTTATCTCCAGCGTCC    |
| <i>cts-1</i>  | Forward: CTCGACA ACTTCCCAGATAACC<br>Reverse: GGTACAGGTTGCGATAGATGATAGC |

---

|                |                                                                         |
|----------------|-------------------------------------------------------------------------|
| <i>nd-1</i>    | Forward: AGCGTCATTTATTGGGAAGAAGAC<br>Reverse: AAGCTTGTGCTAATCCCATAAATGT |
| <i>MTCE.26</i> | Forward: GGTTGTGGGACTAGGTGAACA<br>Reverse: CAGGGTGCCCCATTGTTCTT         |
| <i>act-3</i>   | Forward: TGCGACATTGATATCCGTAAGG<br>Reverse: GGTGGTTCTCCGAAAGAA          |
| <i>18s</i>     | Forward: GCGAAAGCATTGCCAAGAA<br>Reverse: ATCGCGAGATGGCATCGTT            |
| <i>act-1</i>   | Forward: GCTGGACGTGATCTTACTGATTACC<br>Reverse: GTAGCAGAGCTTCTCCTTGATGTC |
| <i>ama-1</i>   | Forward: CTGACCCAAAGAACACGGTGA<br>Reverse: TCCAATTCGATCCGAAGAAGC        |

---

76 **Table S2 EGCG robustly extends lifespan dependent on concentrations, related to**  
 77 **Figure 1A, 1B, S1A, S1B, S1D, S1H and S1I.**

| Regimens                                     | EGCG Concentrations ( $\mu\text{M}$ ) | Mean lifespan(d) $\pm$ SEM ( <i>P</i> Value) | Max lifespan(d) $\pm$ SEM ( <i>P</i> Value) <sup>#</sup> | N (trials/n)   |
|----------------------------------------------|---------------------------------------|----------------------------------------------|----------------------------------------------------------|----------------|
|                                              | 0                                     | 25.3 $\pm$ 0.6 (n.s.)                        | 35.0 $\pm$ 0.7 (n.s.)                                    | 111 (1)        |
|                                              | 10                                    | 25.6 $\pm$ 0.5 (n.s.)                        | 35.1 $\pm$ 0.4 (n.s.)                                    | 108 (1)        |
|                                              | 25                                    | 25.4 $\pm$ 0.6 (n.s.)                        | 35.0 $\pm$ 0.3 (n.s.)                                    | 110 (1)        |
|                                              | 50                                    | 26.6 $\pm$ 0.5 (n.s.)                        | 36.0 $\pm$ 0.7 (n.s.)                                    | 106 (1)        |
|                                              | 100                                   | 28.7 $\pm$ 0.5 (<0.001)                      | 35.8 $\pm$ 0.4 (n.s.)                                    | 111 (1)        |
| Arrested OP50<br>(N2/20 °C)                  | 200                                   | 29.5 $\pm$ 0.5 (<0.001)                      | 36.1 $\pm$ 0.6 (n.s.)                                    | 108 (1)        |
|                                              | 300                                   | 27.1 $\pm$ 0.5 (<0.01)                       | 36.4 $\pm$ 0.6 (n.s.)                                    | 107 (1)        |
|                                              | 400                                   | 25.3 $\pm$ 0.7 (n.s.)                        | 34.8 $\pm$ 0.9 (n.s.)                                    | 107 (1)        |
|                                              | 500                                   | 25.2 $\pm$ 0.4 (n.s.)                        | 34.6 $\pm$ 0.1 (n.s.)                                    | 108 (1)        |
|                                              | 600                                   | 24.7 $\pm$ 0.8 (n.s.)                        | 34.1 $\pm$ 0.2 (n.s.)                                    | 112 (1)        |
|                                              | 800                                   | 23.3 $\pm$ 0.5 (<0.001)                      | 31.2 $\pm$ 0.6 (<0.001)                                  | 106 (1)        |
|                                              | 1000                                  | 21.1 $\pm$ 0.5 (<0.001)                      | 30.4 $\pm$ 1.0 (<0.001)                                  | 106 (1)        |
|                                              | Live OP50<br>(N2/20 °C)               | 0                                            | 19.5 $\pm$ 0.4                                           | 26.8 $\pm$ 0.2 |
| 200                                          |                                       | 23.9 $\pm$ 0.4 (<0.001)                      | 28.0 $\pm$ 0.1 (n.s.)                                    | 264 (3)        |
| Arrested OP50<br>(BA17/25 °C)                | 0                                     | 19.4 $\pm$ 0.7                               | 25.1 $\pm$ 0.5                                           | 165 (2)        |
|                                              | 200                                   | 23.4 $\pm$ 0.5 (<0.001)                      | 26.9 $\pm$ 0.9 (n.s.)                                    | 182 (2)        |
| Arrested OP50<br>(N2/25 °C)                  | 0                                     | 18.1 $\pm$ 0.3                               | 23.9 $\pm$ 1.0                                           | 198 (2)        |
|                                              | 200                                   | 20.2 $\pm$ 0.3 (<0.001)                      | 25.1 $\pm$ 1.5 (n.s.)                                    | 187 (2)        |
| EGCG pretreated<br>OP50 (Live)<br>(N2/20 °C) | 0                                     | 21.0 $\pm$ 0.4                               | 27.6 $\pm$ 0.6                                           | 174 (2)        |
|                                              | 200                                   | 21.2 $\pm$ 0.5(n.s.)                         | 27.3 $\pm$ 0.4(n.s.)                                     | 182 (2)        |
| Arrested OP50<br>No Ampicillin<br>(N2/20 °C) | 0                                     | 23.6 $\pm$ 1.6                               | 34.0 $\pm$ 0.6                                           | 163 (2)        |
|                                              | 200                                   | 27.9 $\pm$ 0.6 (<0.001)                      | 34.6 $\pm$ 0.5 (n.s.)                                    | 182 (2)        |
| Arrested OP50<br>No FUdR<br>(N2/20 °C)       | 0                                     | 24.6 $\pm$ 0.6                               | 34.5 $\pm$ 0.5                                           | 169 (2)        |
|                                              | 200                                   | 28.7 $\pm$ 0.6 (<0.001)                      | 34.1 $\pm$ 0.7 (n.s.)                                    | 142 (2)        |

78 n.s.= not significant

79 N= total worm number

80 *P* value compared to the Vehicle (0) group

81 **Table S3 - EGCG extends lifespan independent on the larval stage, related to Figure S3A,**  
 82 **S3B, S3C and S3D (Arrested OP50/20 °C)**

| Regimens                                | EGCG Concentrations (μM) | Mean lifespan(d) ±SEM (p Value) | Max lifespan(d) ±SEM (p Value) <sup>#</sup> | N (trials) |
|-----------------------------------------|--------------------------|---------------------------------|---------------------------------------------|------------|
| The whole adulthood                     | 0                        | 24.0 ± 1.1                      | 35.0 ± 0.9                                  | 186 (2)    |
|                                         | 200                      | 28.6 ± 1.3 (<0.001)             | 36.3 ± 1.7(n.s)                             | 175 (2)    |
| From eggs to all dead                   | 0                        | 23.5 ± 0.8                      | 33.8±0.3                                    | 160 (2)    |
|                                         | 200                      | 27.9±0.3 (<0.001)               | 34.3±0.7(n.s)                               | 164 (2)    |
| F1<br>From eggs to L4                   | 0                        | 25.3±0.6                        | 35.1 ± 0.7                                  | 201 (2)    |
|                                         | 200                      | 25.9±0.5 (n.s.)                 | 35.3 ± 0.6 (n.s.)                           | 178 (2)    |
| F2<br>From eggs to L4                   | 0                        | 24.3±0.5                        | 35.6 ± 0.6                                  | 184 (2)    |
|                                         | 200                      | 24.7±0.5 (n.s.)                 | 34.9 ± 0.4(n.s.)                            | 194 (2)    |
| F6<br>From eggs to L4 for 5 generations | 0                        | 25.8±0.6                        | 35.9 ± 0.6                                  | 163 (2)    |
|                                         | 200                      | 25.3±0.4 (n.s.)                 | 35.5 ± 0.4 (n.s.)                           | 182 (2)    |

83 n.s.= not significant

84 N= total worm number

85 P value compared to the Vehicle (0) group

86 **Table S4 – EGCG induced lifespan extension is timing requirement, related to Figure 1C,**  
 87 **1D, 1E, 1F, 1G, 1H, 1I, S3E, S3F and S3G (Arrested OP50/20 °C)**

| Regimens (Adulthood)                              | EGCG Concentrations (µM) | Mean lifespan(d) ±SEM (p Value) | Max lifespan(d) ±SEM (p Value) <sup>#</sup> | N (trials) |
|---------------------------------------------------|--------------------------|---------------------------------|---------------------------------------------|------------|
| The first 6 days                                  | 0                        | 23.9 ± 0.5                      | 32.5 ± 0.3                                  | 189 (2)    |
|                                                   | 200                      | 26.2 ± 0.4 (<0.001)             | 33.3 ± 0.7 (n.s.)                           | 178 (2)    |
| From the 6 <sup>th</sup> to 12 <sup>th</sup> days | 0                        | 18.3 ± 0.7                      | 25.8 ± 0.5                                  | 201 (3)    |
|                                                   | 200                      | 20.9 ± 0.9 (n.s.)               | 25.9 ± 0.6 (n.s.)                           | 178 (3)    |
| From the 6 <sup>th</sup> days to all dead         | 0                        | 17.3 ± 0.5                      | 26.4 ± 0.6                                  | 164 (2)    |
|                                                   | 200                      | 19.8 ± 0.5 (<0.01)              | 27.3 ± 0.4 (n.s.)                           | 174 (2)    |
|                                                   | 400                      | 17.1 ± 0.6 (n.s.)               | 26.9 ± 0.2 (n.s.)                           | 168 (2)    |
| From the 12 <sup>th</sup> days to all dead        | 0                        | 17.3 ± 0.5                      | 20.1 ± 0.6                                  | 189 (2)    |
|                                                   | 200                      | 19.8 ± 0.5 (<0.05)              | 20.9 ± 0.4(n.s.)                            | 196 (2)    |
|                                                   | 400                      | 11.2 ± 0.4 (<0.01)              | 18.6 ± 0.3 (<0.05)                          | 157 (2)    |
| From the 18 <sup>th</sup> days to all dead        | 0                        | 8.2 ± 0.6                       | 13.8 ± 0.6                                  | 209 (3)    |
|                                                   | 200                      | 7.6 ± 0.4 (n.s.)                | 12.9 ± 0.4 (n.s.)                           | 212 (3)    |
|                                                   | 400                      | 6.2 ± 0.3 (<0.001)              | 12.1 ± 0.1 (<0.01)                          | 231 (3)    |
| The whole adulthood                               | 0                        | 23.1 ± 0.6                      | 34.1 ± 0.6                                  | 161 (2)    |
|                                                   | 200                      | 27.0 ± 0.5 (<0.001)             | 35.0 ± 1.0 (n.s.)                           | 166 (2)    |
| The first 15 days of adulthood                    | 200                      | 27.1 ± 0.6 (<0.001)             | 35.4 ± 0.6 (n.s.)                           | 177 (2)    |

88 n.s.= not significant

89 N= total worm number

90 P value compared to the Vehicle (0) group

91 **Table S5 – The antioxidant abolishes the lifespan-extending effects of EGCG, related to**  
 92 **Figure 2B (Arrested OP50/20 °C)**

| Regimens    | EGCG Concentrations (μM) | Mean lifespan(d) ±SEM (p Value) | Max lifespan(d) ±SEM (p Value) <sup>#</sup> | N (trials) |
|-------------|--------------------------|---------------------------------|---------------------------------------------|------------|
|             | 0                        | 24.8±0.6                        | 33.9±0.4                                    | 82 (1)     |
|             | 200                      | 28.5±0.5 (<0.001)               | 34.0±0.3 (n.s)                              | 86 (1)     |
| NAC (5 mM)  | 0                        | 24.6±0.6                        | 34.3 ± 0.7                                  | 186 (2)    |
|             | 200                      | 24.9±0.5 (n.s)                  | 33.8 ± 0.6 (n.s.)                           | 178 (2)    |
| BHA (25 μM) | 0                        | 24.7±0.7                        | 34.6 ± 0.7                                  | 174 (2)    |
|             | 200                      | 24.7±0.8 (n.s.)                 | 34.8 ± 0.4 (n.s.)                           | 164 (2)    |

93 n.s.= not significant

94 N= total worm number

95 P value compared to the Vehicle (0) group



96 **Table S6 – Paraquats and 2-deoxy-D-glucose promotes the lifespan-extending effects**  
 97 **with EGCG synergistically, related to Figure 2C and S4C (Arrested OP50/20 °C)**

| Regimens                | EGCG Concentrations (μM) | Mean lifespan(d) ±SEM (p Value) | Max lifespan(d) ±SEM (p Value) <sup>#</sup> | N (trials) |
|-------------------------|--------------------------|---------------------------------|---------------------------------------------|------------|
|                         | 0                        | 24.8 ± 0.5                      | 34.6±0.4                                    | 105 (1)    |
|                         | 200                      | 27.4 ± 0.5 (<0.001)             | 36.0±0.7 (n.s)                              | 95 (1)     |
| Paraquats (200 μM)      | 0                        | 30.9 ± 0.5 (<0.001)             | 39.3 ± 0.9 (<0.001)                         | 105 (1)    |
|                         | 200                      | 34.7 ± 0.6 (<0.001)             | 42.6 ± 1.5 (<0.001)                         | 90 (1)     |
| 2-deoxy-D-glucose(5 mM) | 0                        | 31.3 ± 0.2 (<0.001)             | 38.5 ± 0.5 (<0.001)                         | 115 (1)    |
|                         | 200                      | 35.1 ± 1.1 (<0.001)             | 43.1 ± 1.0 (<0.001)                         | 98 (1)     |

98 n.s.= not significant

99 N= total worm number

100 P value compared to the Vehicle (0) group

101 **Table S7 – The antioxidant abolished the oxidative stress resistance effects of EGCG,**  
 102 **related to Figure S4D and 2D (Arrested OP50/20 °C)**

| Regimens                  | EGCG Concentrations (μM) | Mean lifespan(d) ±SEM (p Value) | N (trials) |
|---------------------------|--------------------------|---------------------------------|------------|
| EGCG for 2 d              | 0                        | 8.3 ± 0.9                       | 248 (3)    |
|                           | 200                      | 8.2 ± 1.1 (n.s.)                | 264 (3)    |
| EGCG for 6 d              | 0                        | 6.8 ± 0.6                       | 306 (4)    |
|                           | 200                      | 8.3 ± 0.9 (< 0.001)             | 291 (4)    |
| EGCG & NAC (5 mM) for 6 d | 0                        | 6.3 ± 0.7                       | 154 (2)    |
|                           | 200                      | 6.8 ± 0.8 (n.s.)                | 154 (2)    |

103 n.s.= not significant

104 N= total worm number

105 P value compared to the Vehicle (0) group

106 **Table S8 - EGCG does not change or shortens lifespan in the ETC mutants, related to**  
 107 **Figure 3G, 3H, 3I, 3J and 3K (Arrested OP50/20 °C)**

| Regimens | EGCG Concentrations (μM) | Mean lifespan(d) ±SEM (p Value) | Max lifespan(d) ±SEM (p Value) <sup>#</sup> | N (trials) |
|----------|--------------------------|---------------------------------|---------------------------------------------|------------|
| CW152    | 0                        | 18.0 ± 0.5                      | 24.4 ± 0.3                                  | 81 (1)     |
|          | 200                      | 15.6 ± 0.4 (<0.05)              | 22.1 ± 0.4 (<0.01)                          | 76 (1)     |
| MQ1333   | 0                        | 33.7 ± 0.7                      | 44.8 ± 0.9                                  | 88 (1)     |
|          | 200                      | 33.5 ± 0.5 (n.s.)               | 46.1 ± 1.1 (n.s.)                           | 79 (1)     |
| TK22     | 0                        | 18.4 ± 0.4                      | 26.2 ± 0.5                                  | 88 (1)     |
|          | 200                      | 15.1 ± 0.5 (<0.001)             | 23.1 ± 0.1 (<0.001)                         | 98 (1)     |
| MQ887    | 0                        | 35.0 ± 0.8                      | 47.3 ± 0.5                                  | 86 (1)     |
|          | 200                      | 34.4 ± 0.8 (n.s.)               | 47.0 ± 0.4 (n.s.)                           | 93 (1)     |
| MQ130    | 0                        | 29.9 ± 0.6                      | 39.9 ± 0.5                                  | 84 (1)     |
|          | 200                      | 27.3 ± 0.7 (<0.001)             | 36.7 ± 0.7 (<0.01)                          | 74 (1)     |

108 n.s.= not significant  
 109 N= total worm number  
 110 P value compared to the Vehicle (0) group

111 **Table S9 – EGCG does not increase healthspan of *aak-2-* or *sir-2.1-*deficient mutants,**  
 112 **related to Figure 4A, 4D 4G 4I, S6A and S6F(Arrested OP50/20 °C)**

| Regimens /Strains                                         | EGCG                |                                            | Max lifespan(d)<br>±SEM ( <i>p</i> Value) <sup>#</sup> | N (trials) |
|-----------------------------------------------------------|---------------------|--------------------------------------------|--------------------------------------------------------|------------|
|                                                           | Concentrations (µM) | Mean lifespan(d)<br>±SEM ( <i>p</i> Value) |                                                        |            |
| Lifespan /RB754                                           | 0                   | 19.0 ± 1.8                                 | 25.4 ± 1.4                                             | 242 (3)    |
|                                                           | 200                 | 19.1 ± 2.5 (n.s.)                          | 26.1 ± 1.3 (n.s.)                                      | 226 (3)    |
| Lifespan /MR507                                           | 0                   | 20.0 ± 0.3                                 | 25.8 ± 0.7                                             | 79 (1)     |
|                                                           | 200                 | 19.6 ± 0.4 (n.s.)                          | 25.1 ± 0.6 (n.s.)                                      | 79 (1)     |
| Lifespan /VC199                                           | 0                   | 22.0 ± 0.5                                 | 29.1 ± 0.5                                             | 175 (2)    |
|                                                           | 200                 | 22.5 ± 0.5 (n.s.)                          | 29.3 ± 0.2 (n.s.)                                      | 173 (2)    |
| Lifespan /IU7                                             | 0                   | 22.9 ± 0.4                                 | 28.8 ± 0.3                                             | 97 (1)     |
|                                                           | 200                 | 22.3 ± 0.4 (n.s.)                          | 28.5 ± 0.1 (n.s.)                                      | 80 (1)     |
| Lifespan /MIR13                                           | 0                   | 17.6 ± 0.4                                 | 22.4 ± 0.4                                             | 74 (1)     |
|                                                           | 200                 | 17.2 ± 0.3 (n.s.)                          | 22.1 ± 0.6 (n.s.)                                      | 70 (1)     |
| Exposure to 5 mM paraquats after 6 d EGCG treatment/RB754 | 0                   | 3.8±0.4                                    | 6.1 ± 0.7                                              | 201 (2)    |
|                                                           | 200                 | 3.7±0.2 (n.s.)                             | 5.4 ± 0.4 (n.s.)                                       | 209 (2)    |

113 n.s.= not significant

114 N= total worm number

115 *P* value compared to the Vehicle (0) group

116 **Table S10 – EGCG increases lifespan dependent on *daf-16*, independent of *daf-2* or *age-1***  
 117 **related to Figure 5A, 5B, 5C and 5G (Arrested OP50/20 °C)**

| Regimens /Strains | EGCG Concentrations (μM) | Mean lifespan(d) ±SEM (p Value) | Max lifespan(d) ±SEM (p Value) <sup>#</sup> | N (trials) |
|-------------------|--------------------------|---------------------------------|---------------------------------------------|------------|
| CF1038            | 0                        | 18.2 ± 0.4                      | 24.9 ± 0.1                                  | 93 (1)     |
|                   | 200                      | 18.4 ± 0.4 (n.s.)               | 25.3 ± 0.4 (n.s.)                           | 87 (1)     |
| CB1370            | 0                        | 47.3 ± 1.0                      | 64.9 ± 0.6                                  | 84 (1)     |
|                   | 200                      | 51.6 ± 1.0 (<0.001)             | 65.3 ± 0.6 (n.s.)                           | 101 (1)    |
| TJ1052            | 0                        | 32.5 ± 0.8                      | 42.9 ± 0.6                                  | 93 (1)     |
|                   | 200                      | 35.4 ± 0.8 (<0.001)             | 43.3 ± 0.6 (n.s.)                           | 86 (1)     |
| CF1558            | 0                        | 19.1 ± 0.3                      | 23.2 ± 0.1                                  | 81 (1)     |
|                   | 200                      | 19.6 ± 0.3 (n.s.)               | 23.3 ± 0.4 (n.s.)                           | 76 (1)     |

118 n.s.= not significant

119 N= total worm number

120 P value compared to the Vehicle (0) group

121 **Table S11 – The oxidative stress resistance is weaker at older worms after EGCG**  
 122 **treatment for 6 days, related to Figure 6C (Arrested OP50/20 °C)**

| Regimens     | EGCG Concentrations (µM) | Mean lifespan(d) ±SEM (p Value) | N (trials) |
|--------------|--------------------------|---------------------------------|------------|
| Day 0-Day 6  | 0                        | 6.7 ± 0.2                       | 161 (2)    |
|              | 200                      | 8.4 ± 0.3 (< 0.001)             | 143 (2)    |
| Day 6-Day 12 | 0                        | 4.6 ± 0.2                       | 147 (2)    |
|              | 200                      | 5.3 ± 0.3 (< 0.05)              | 135 (2)    |

123 n.s.= not significant

124 N= total worm number

125 P value compared to the Vehicle (0) group

## 126 Supplemental Experimental Procedures

### 127 *Bacterial growth assays*

128 Liquid bacterial growth was performed as described previously [1]. Overnight *E.coli* was diluted  
129 (1:100) in LB (with and without EGCG) at pH = 7.0 over an 8-h period with shaking at 37 °C.  
130 Cell density was monitored at different time intervals by measuring OD600.

### 131 *Measurement of pharyngeal pumping rates and locomotion*

132 Pumping of nematodes was determined in a 1-min period [2]. Eight to ten worms in each  
133 condition were scored, beginning at Day 2 of the experiment and continued every other day  
134 until day 30.

135 A further index of age-associated decline in physiological capacity, based on measurement of  
136 the progressive functional decline of locomotion was used [3]. Briefly, worms (> 200) were  
137 observed for locomotor activity and subdivided into three groups: class A worms were healthy,  
138 showed spontaneous movements, and highly mobile; class B worms showed movement only  
139 after prodding; and class C worms movement was restricted to the head or tail upon prodding  
140 with a platinum wire. Only A type worms were counted as healthy.

### 141 *Food preference assay*

142 Protocol adapted as described previously [4]. A 100 mm NGM plate was seed with two spots of  
143 OP50. After letting the OP50 lawns dry over 2 days at room temperature, Vehicle (H<sub>2</sub>O/0 μM  
144 EGCG) or EGCG (200 μM) was added to the top of the lawn and allowed to dry. Approximately  
145 50-100 synchronized prefertile young adult worms were placed onto the center of the plate and  
146 their preference for either bacterial lawn was record after 3 h at room temperature.

### 147 *Food uptake quantification*

148 To analyze the total amount of incorporated food, worms were pretreated with EGCG as  
149 described previously with little modification [5]. Next, worms were transferred to plates spotted  
150 with a defined volume of heat killed OP50. Worms were allowed to consume OP50 for 6 h.  
151 afterwards, the remaining OP50 and worms were thoroughly removed and transferred in a  
152 reaction tube. Worms were spun down at low speed and an aliquot of the supernatant was  
153 removed for a subsequent optical density (OD600) determination. An empty reference plate  
154 was equally handled.

#### 155 *Body length measurement*

156 Body length was measured as described previously [6]. L1 worms were cultured in the  
157 presence of EGCG for 72 h. At the end of the exposure period, eight to ten worms per condition  
158 were heated to approximately 50 °C and the length of the body was measured using the  
159 distance measurement of the software in an invert fluorescent microscope (Olympus X71).

#### 160 *Reproduction assay*

161 The assay was conducted as described previously [2]. To obtain synchronised worms for  
162 reproduction assays, eight to ten gravid worms were grown on NGM plates with or without  
163 EGCG, allowing them to lay eggs for one hour. To determine the average brood size per worm,  
164 ten pretreated L4 worms were transferred to NGM without EGCG and moved to a fresh plate  
165 each day until reproduction ceased. The offspring of each worm was scored at the L2 or L3  
166 stage.

167 To determine fertility of worms [7], eight to ten worms at the egg-laying period were placed on  
168 NGM plates per condition and were removed after an incubation period of 4 hr. The progeny  
169 were allowed to develop for 48 h, and infertile eggs and hatched worms were counted.



170 *Larval development in the presence of EGCG*

171 Larval development was assayed as described previously [8]. The eggs per plate were obtained  
172 by incubating ten egg-laying (gravid) worms. Adult worms were discarded from plates (after 2 h),  
173 and the eggs were used for experiments as subsequently described. The eggs were incubated  
174 with EGCG, and development from eggs to adult worms was monitored on NGM plates. The  
175 developmental stage of each worm was recorded daily for 4 days.

176 *Transgenerational impacts assay*

177 This assay was performed by the method as described previously with some modification [9].  
178 Eggs were transferred to an NGM plate with EGCG, which were designated as the first  
179 generation (F1). When F1 reached young adult stage, several F1 worms of each group were  
180 picked and transferred to fresh EGCG treatment plates correspondingly, allowed to lay eggs (F2)  
181 for some hours and then picked off the plates. Subsequently, F2 worms were treated following  
182 this method until F5. We used synchronous F2 (only treat with EGCG for F1) and F6 worms for  
183 the lifespan assays. F2 and F6 worms were incubated on the NGM without EGCG from the  
184 prefertile young adult stage until the end of the assays.

185

## 186 Supplemental references

- 187 [1] Xiong, L.-G.; Chen, Y.-J.; Tong, J.-W.; Huang, J.-A.; Li, J.; Gong, Y.-S.; Liu, Z.-H. Tea polyphenol  
188 epigallocatechin gallate inhibits *Escherichia coli* by increasing endogenous oxidative stress. *Food Chem.*  
189 **217**:196-204; 2017.
- 190 [2] Ludewig, A. H.; Izrayelit, Y.; Park, D.; Malik, R. U.; Zimmermann, A.; Mahanti, P.; Fox, B. W.; Bethke, A.;  
191 Doering, F.; Riddle, D. L. Pheromone sensing regulates *Caenorhabditis elegans* lifespan and stress resistance via  
192 the deacetylase SIR-2.1. *P. Natl. Acad. Sci. USA* **110**:5522-5527; 2013.
- 193 [3] Collins, J.; Huang, C.; Hughes, S.; Kornfeld, K. The measurement and analysis of age-related changes in  
194 *Caenorhabditis elegans* (December 7, 2007), WormBook, ed. The *C. elegans* Research Community, WormBook,  
195 doi/10.1895/wormbook. 1.137. 1. 2007.
- 196 [4] Chin, R. M.; Fu, X.; Pai, M. Y.; Vergnes, L.; Hwang, H.; Deng, G.; Diep, S.; Lomenick, B.; Meli, V. S.; Monsalve,  
197 G. C. The metabolite [agr]-ketoglutarate extends lifespan by inhibiting ATP synthase and TOR. *Nature*  
198 **510**:397-401; 2014.
- 199 [5] Schmeisser, S.; Priebe, S.; Groth, M.; Monajembashi, S.; Hemmerich, P.; Guthke, R.; Platzer, M.; Ristow, M.  
200 Neuronal ROS signaling rather than AMPK/sirtuin-mediated energy sensing links dietary restriction to lifespan  
201 extension. *Mol. Metab.* **2**:92-102; 2013.
- 202 [6] Saul, N.; Pietsch, K.; Stürzenbaum, S. R.; Menzel, R.; Steinberg, C. E. Diversity of polyphenol action in  
203 *Caenorhabditis elegans*: between toxicity and longevity. *J. Nat. Prod.* **74**:1713-1720; 2011.
- 204 [7] Schulz, T. J.; Zarse, K.; Voigt, A.; Urban, N.; Birringer, M.; Ristow, M. Glucose restriction extends  
205 *Caenorhabditis elegans* life span by inducing mitochondrial respiration and increasing oxidative stress. *Cell Metab.*  
206 **6**:280-293; 2007.
- 207 [8] Hyun, M.; Lee, J.; Lee, K.; May, A.; Bohr, V. A.; Ahn, B. Longevity and resistance to stress correlate with DNA  
208 repair capacity in *Caenorhabditis elegans*. *Nucleic Acids Res.* **36**:1380-1389; 2008.
- 209 [9] Zhang, W.; Sun, B.; Zhang, L.; Zhao, B.; Nie, G.; Zhao, Y. Biosafety assessment of Gd@ C 82 (OH) 22  
210 nanoparticles on *Caenorhabditis elegans*. *Nanoscale* **3**:2636-2641; 2011.

211

212
